# Supplementary material for: Whole-Genome Comparison of Two Campylobacter jejuni Isolates of the Same Sequence Type Reveals Multiple Loci of Different Ancestral Lineage
Source: PLoS One. 2011 Nov 11;6(11):e27121. doi: 10.1371/journal.pone.0027121 (PMC3214069; doi:10.1371/journal.pone.0027121)
Supplement: Table S1 — Genome characteristics of 11 reference genomes and 5 plasmids from C. jejuni. (XLSX) [file pone.0027121.s009.xlsx]

## Sheet: Sheet1
Suppl. Table S1: Genome characteristics of 11 reference genomes and 5 plasmids from C. jejuni
									P110b		H22082
Locus ID	GenBank	NCBI Genome Project ID	Genome Project	Genome Length (Mb)	Number of genes	Number of sequences in project	Sequence Type (ST)	Clonal complex (CC)	Mapped reads	% filtered reads mapped	Mapped reads	% filtered reads mapped
NZ_ AANT00000000	AANT00000000	16367	subsp. jejuni 84-25	1.672	1748	5	21	21	4648715	87.461	2864003	89.092
NZ_ AANJ00000000	AANJ00000000	16265	subsp. jejuni CF93-6	1.676	1757	14	883	21	4642698	87.348	2852499	88.735
NC_002163	AL111168	8	subsp. jejuni NCTC 11168	1.642	1634	1	43	21	4644197	87.376	2854427	88.795
NC_003912	CP000025	303	RM1221	1.778	1838	1	354	354	4434859	83.437	2722323	84.685
NZ_ AASY00000000	AASY00000000	17055	subsp. jejuni CG8486	1.598	1425	19	2943	574	4426464	83.279	2717915	84.548
NZ_ ABGQ00000000	ABGQ00000000	21037	subsp. jejuni CG8421	1.609	1512	20	1919	52	4369557	82.209	2683249	83.47
NZ_ AANQ00000000	AANQ00000000	16267	subsp. jejuni HB93-13	1.695	1710	35	22	22	4345276	81.752	2668706	83.017
NZ_ AANK00000000	AANK00000000	16229	subsp. jejuni 260.94	1.658	1716	10	362	362	4278205	80.49	2630066	81.815
NC_008787	CP000538	16135	subsp. jejuni 81-176	1.617	1653	1	604	42	4252613	80.009	2613003	81.284
NC_009839	CP000814	17953	subsp. jejuni 81116	1.628	1681	1	267	283	4166434	78.387	2555357	79.491
NC_009707	CP000768	17163	subsp. doylei 269.97	1.845	1731	1	1845	nd	3637536	68.437	2208318	68.696
NC_007141	AY714214	13965	81-176 plasmid pTet	0.045	44	1	n/a	n/a	1	0	0	0
NC_004997	AY256846	15394	plasmid pCJ419	0.004	4	1	n/a	n/a	31	0.001	18	0.001
NC_005012	AF226280	15929	81-176 plasmid pVir	0.037	52	1	n/a	n/a	897	0.017	510	0.016
NC_008052	DQ518173	16867	plasmid pCJ1170	0.004	3	1	n/a	n/a	0	0	0	0
NC_008438	AF301164	17917	plasmid pCJ01	0.003	4	1	n/a	n/a	31	0.001	18	0.001
In addition, the table shows the results of mapping the short read sequences from the two ST-474 isolates to these reference genomes using the short read mapper Maq.
