# Supplementary material for: Whole-Genome Comparison of Two Campylobacter jejuni Isolates of the Same Sequence Type Reveals Multiple Loci of Different Ancestral Lineage
Source: PLoS One. 2011 Nov 11;6(11):e27121. doi: 10.1371/journal.pone.0027121 (PMC3214069; doi:10.1371/journal.pone.0027121)
Supplement: Table S3 — de novo assembly metrics for P110b and H22082 using Velvet and minimus. (XLSX) [file pone.0027121.s011.xlsx]

## Sheet: Sheet1
Suppl. Table T3: de novo assembly metrics for P110b and H22082 using Velvet and minimus
			Velvet assembly					Minimus assembly
Sample	kmer	Contigs	N50 (bp)	Max (bp)	Total length (bp)	Used reads in graph	%reads mapped	Minimus contigs	Total length (bp)	Used reads in graph	%reads mapped
P110b	17	12540	215	2532	1653196	5166927	95.865	134	1590826	5089190	95.748
	19	796	5240	22142	1663337	5089370	94.426	40	1638575	5097579	95.906
	21	249	31283	121122	1666946	4991502	92.61	29	1672617	5099109	95.935
	23	171	82278	196769	1667497	4895959	90.837	28	1652472	5097673	95.908
	25	171	76088	196769	1668269	4825194	89.524	29	1656341	5098824	95.929
	27	174	63064	152071	1668693	4757636	88.271	29	1656200	5098336	95.92
	29	195	31897	112554	1668199	4688858	86.995	35	1659143	5099253	95.937
	31	602	5937	42155	1664777	4608198	85.498	47	1638893	5097634	95.907
H22082	17	7049	454	2924	1578191	3143526	96.072	125	1595465	3093150	96.221
	19	749	5102	23528	1631797	3116465	95.245	47	1642289	3098567	96.389
	21	227	27694	68343	1631599	3073286	93.925	33	1695316	3098512	96.388
	23	209	29071	87514	1637937	3033476	92.708	33	1683680	3099854	96.429
	25	242	24772	59494	1637925	2998952	91.653	28	1659123	3099655	96.423
	27	375	9357	45920	1629262	2955294	90.319	36	1636611	3099603	96.421
	29	887	3183	17636	1597399	2885720	88.193	50	1612002	3093314	96.226
	31	2918	781	6118	1484914	2728653	83.392	93	1593030	3080110	95.815
Characteristics of the assemblies are described, as well as the number of short sequence reads mapping back to these contigs.
