# Supplementary material for: Whole-Genome Comparison of Two Campylobacter jejuni Isolates of the Same Sequence Type Reveals Multiple Loci of Different Ancestral Lineage
Source: PLoS One. 2011 Nov 11;6(11):e27121. doi: 10.1371/journal.pone.0027121 (PMC3214069; doi:10.1371/journal.pone.0027121)
Supplement: Table S4 — The number of sequence differences between the two ST-474 isolates and each of the eleven C. jejuni reference strains. (XLSX) [file pone.0027121.s012.xlsx]

## Sheet: Sheet1
Suppl. Table S4: The number of sequence differences between the two ST-474 isolates and each of the eleven C. jejuni reference strains
	P110b DNA		P110b protein		H22082 DNA		H22082 protein
Genome	Differences	Rank	Differences	Rank	Differences	Rank	Differences	Rank	Average rank
CJJ8425	2892	2	698	1	2987	2	703	1	1.5
NC_002163	2826	1	701	2	2971	1	726	2	1.5
CJJCF936	3103	3	737	3	3235	3	761	3	3
CG8486	5154	4	1292	4	5257	4	1313	4	4
CG8421	5363	5	1361	5	5412	5	1376	5	5
NC_003912	5381	6	1380	6	5414	6	1391	6	6
CJJHB9313	6568	7	1439	7	6539	7	1429	7	7
NC_008787	7342	8	1668	9	7319	8	1658	9	8.5
NC_009839	7664	10	1621	8	7629	10	1615	8	9
260_94	7388	9	1704	10	7371	9	1700	10	9.5
NC_009707	13926	11	3408	11	13912	11	3402	11	11
Differences were calculated at both the DNA and protein level for the 477 core genes that showed no length variation in the core genome across the 11 reference strains and the two ST-474 isolates (a total of 143070 amino acids and 430461 nucleotides).
